# Supplementary material for: Pathway-specific protein domains are predictive for human diseases
Source: PLoS Comput Biol. 2019 May 10;15(5):e1007052. doi: 10.1371/journal.pcbi.1007052 (PMC6530867; doi:10.1371/journal.pcbi.1007052)
Supplement: S6 Table — (XLSX) [file pcbi.1007052.s009.xlsx]

## Sheet: Sheet1
S6 Table. Priorized genes for coronary artery disease (CAD) by # of PSD (GWAS∩PSD set is highlighted)
rank	geneID	symbol	# PSD	category
1	32	ACACB	13	unknown
2	22931	RAB18	6	unknown
3	326624	RAB37	5	unknown
3	6580	SLC22A1	5	unknown
3	3674	ITGA2B	5	known
3	6582	SLC22A2	5	unknown
7	3106	HLA-B	4	CADgeneDB
7	3107	HLA-C	4	unknown
7	58480	RHOU	4	unknown
7	1373	CPS1	4	unknown
7	4023	LPL	4	known
7	8766	RAB11A	4	unknown
7	8001	GLRA3	4	unknown
7	1583	CYP11A1	4	unknown
7	653145	ANXA8	4	unknown
7	51655	RASD1	4	unknown
17	116443	GRIN3A	3	unknown
17	10314	LANCL1	3	unknown
17	92747	BPIFB1	3	unknown
17	1586	CYP17A1	3	CADgeneDB
17	8841	HDAC3	3	unknown
17	3105	HLA-A	3	unknown
17	366	AQP9	3	CADgeneDB
17	6542	SLC7A2	3	unknown
17	4543	MTNR1A	3	unknown
17	2565	GABRG1	3	unknown
17	7103	TSPAN8	3	unknown
17	7296	TXNRD1	3	unknown
17	59341	TRPV4	3	unknown
17	488	ATP2A2	3	CADgeneDB
17	347	APOD	3	CADgeneDB
17	340665	CYP26C1	3	unknown
17	85320	ABCC11	3	unknown
17	6570	SLC18A1	3	unknown
17	133022	TRAM1L1	3	unknown
17	6581	SLC22A3	3	CADgeneDB
17	7430	EZR	3	unknown
17	1592	CYP26A1	3	unknown
39	51232	CRIM1	2	unknown
39	130026	ICA1L	2	unknown
39	5151	PDE8A	2	unknown
39	149998	LIPI	2	unknown
39	783	CACNB2	2	unknown
39	9815	GIT2	2	unknown
39	5618	PRLR	2	unknown
39	5577	PRKAR2B	2	unknown
39	83732	RIOK1	2	unknown
39	822	CAPG	2	unknown
39	928	CD9	2	unknown
39	26509	MYOF	2	unknown
39	81875	ISG20L2	2	unknown
39	4776	NFATC4	2	unknown
39	4143	MAT1A	2	unknown
39	145482	PTGR2	2	unknown
39	146050	ZSCAN29	2	unknown
39	170692	ADAMTS18	2	unknown
39	3205	HOXA9	2	unknown
39	116068	LYSMD3	2	unknown
39	83990	BRIP1	2	unknown
39	1134	CHRNA1	2	unknown
39	10599	SLCO1B1	2	unknown
39	10007	GNPDA1	2	unknown
39	83716	CRISPLD2	2	unknown
39	83714	NRIP2	2	unknown
39	729330	OC90	2	unknown
39	4547	MTTP	2	CADgeneDB
39	79590	MRPL24	2	unknown
39	1491	CTH	2	unknown
39	8993	PGLYRP1	2	unknown
39	2906	GRIN2D	2	unknown
39	1400	CRMP1	2	unknown
39	4087	SMAD2	2	unknown
39	196883	ADCY4	2	unknown
39	100506084	ARL17B	2	unknown
39	383	ARG1	2	CADgeneDB
39	55289	ACOXL	2	unknown
39	384	ARG2	2	CADgeneDB
39	22880	MORC2	2	unknown
39	1785	DNM2	2	unknown
39	3988	LIPA	2	unknown
39	1241	LTB4R	2	unknown
39	9630	GNA14	2	unknown
39	51629	SLC25A39	2	unknown
39	3352	HTR1D	2	unknown
39	3725	JUN	2	unknown
39	8875	VNN2	2	unknown
39	2778	GNAS	2	unknown
88	8876	VNN1	1	unknown
88	83480	PUS3	1	unknown
88	1993	ELAVL2	1	unknown
88	8887	TAX1BP1	1	unknown
88	100529261	CHURC1-FNTB	1	unknown
88	2917	GRM7	1	unknown
88	3669	ISG20	1	unknown
88	1080	CFTR	1	unknown
88	79611	ACSS3	1	unknown
88	100271849	MEF2B	1	unknown
88	5602	MAPK10	1	unknown
88	54578	UGT1A6	1	unknown
88	6631	SNRPC	1	unknown
88	9033	PKD2L1	1	unknown
88	10985	GCN1L1	1	unknown
88	10100	TSPAN2	1	unknown
88	10213	PSMD14	1	unknown
88	9023	CH25H	1	unknown
88	114134	SLC2A13	1	unknown
88	23094	SIPA1L3	1	unknown
88	11074	TRIM31	1	unknown
88	53828	FXYD4	1	unknown
88	56098	PCDHGC4	1	unknown
88	84173	ELMOD3	1	unknown
88	23131	GPATCH8	1	unknown
88	51752	ERAP1	1	unknown
88	10154	PLXNC1	1	unknown
88	30832	ZNF354C	1	unknown
88	7252	TSHB	1	unknown
88	8825	LIN7A	1	unknown
88	144193	AMDHD1	1	unknown
88	222235	FBXL13	1	unknown
88	158431	ZNF782	1	unknown
88	54675	CRLS1	1	unknown
88	6444	SGCD	1	known
88	7639	ZNF85	1	unknown
88	339896	GADL1	1	unknown
88	85415	RHPN2	1	unknown
88	9148	NEURL1	1	unknown
88	11311	VPS45	1	unknown
88	23192	ATG4B	1	unknown
88	374308	PTCHD3	1	unknown
88	9575	CLOCK	1	CADgeneDB
88	9110	MTMR4	1	unknown
88	5777	PTPN6	1	unknown
88	51366	UBR5	1	unknown
88	1519	CTSO	1	unknown
88	8833	GMPS	1	unknown
88	64699	TMPRSS3	1	unknown
88	10053	AP1M2	1	unknown
88	55846	ITFG2	1	unknown
88	220992	ZNF485	1	unknown
88	84315	MON1A	1	unknown
88	54566	EPB41L4B	1	unknown
88	4089	SMAD4	1	unknown
88	63916	ELMO2	1	unknown
88	6578	SLCO2A1	1	unknown
88	158471	PRUNE2	1	unknown
88	50515	CHST11	1	unknown
88	10716	TBR1	1	unknown
88	10392	NOD1	1	known
88	5860	QDPR	1	unknown
88	338821	SLCO1B7	1	unknown
88	645104	CLRN2	1	unknown
88	84971	ATG4D	1	unknown
88	27091	CACNG5	1	unknown
88	489	ATP2A3	1	unknown
88	3303	HSPA1A	1	CADgeneDB
88	387890	TMEM233	1	unknown
88	57412	AS3MT	1	unknown
88	10257	ABCC4	1	unknown
88	55568	GALNT10	1	unknown
88	9734	HDAC9	1	CADgeneDB
88	79709	COLGALT1	1	unknown
88	23359	FAM189A1	1	unknown
88	10887	PROKR1	1	unknown
88	54805	CNNM2	1	unknown
88	391104	VHLL	1	unknown
88	845	CASQ2	1	CADgeneDB
88	57669	EPB41L5	1	unknown
88	79899	PRR5L	1	unknown
88	266722	HS6ST3	1	unknown
88	55272	IMP3	1	unknown
88	54020	SLC37A1	1	unknown
88	859	CAV3	1	known
88	957	ENTPD5	1	unknown
88	29841	GRHL1	1	unknown
88	6597	SMARCA4	1	unknown
88	10526	IPO8	1	unknown
88	10659	CELF2	1	unknown
88	1729	DIAPH1	1	unknown
88	1775	DNASE1L2	1	unknown
88	7031	TFF1	1	unknown
88	1632	ECI1	1	unknown
88	3382	ICA1	1	unknown
88	10915	TCERG1	1	unknown
88	163183	SYNE4	1	unknown
88	56097	PCDHGC5	1	unknown
88	285613	RELL2	1	unknown
88	860	RUNX2	1	unknown
88	51715	RAB23	1	unknown
88	7092	TLL1	1	unknown
88	84964	ALKBH6	1	unknown
88	7032	TFF2	1	unknown
88	3680	ITGA9	1	unknown
88	284439	SLC25A42	1	unknown
88	55530	SVOP	1	unknown
88	11112	HIBADH	1	unknown
88	84924	ZNF566	1	unknown
88	80745	THUMPD2	1	unknown
88	1192	CLIC1	1	unknown
88	3458	IFNG	1	CADgeneDB
88	4325	MMP16	1	unknown
88	7802	DNALI1	1	unknown
88	100310812	SPDYE2B	1	unknown
